# Supplementary material
Source: publisher figshare collection journal article supplement (https://acs.figshare.com/ndownloader/files/4193275)

Supplementary material to

Improved Folate Extraction and Tracing Deconjugation Efficiency by Dual Label

Isotope Dilution Assays in Foods by Sabine Mönch and Michael Rychlik

: LC-UV chromatogram (A) of 10-HCO- $H_4$ folate obtained from commercial 5,10-methenyl $H_4$ folate by treatment with sodium hydroxide (12) and full scan MS (ESI+  $m/z = 150 - 600$ ) (B) of the respective peaks.

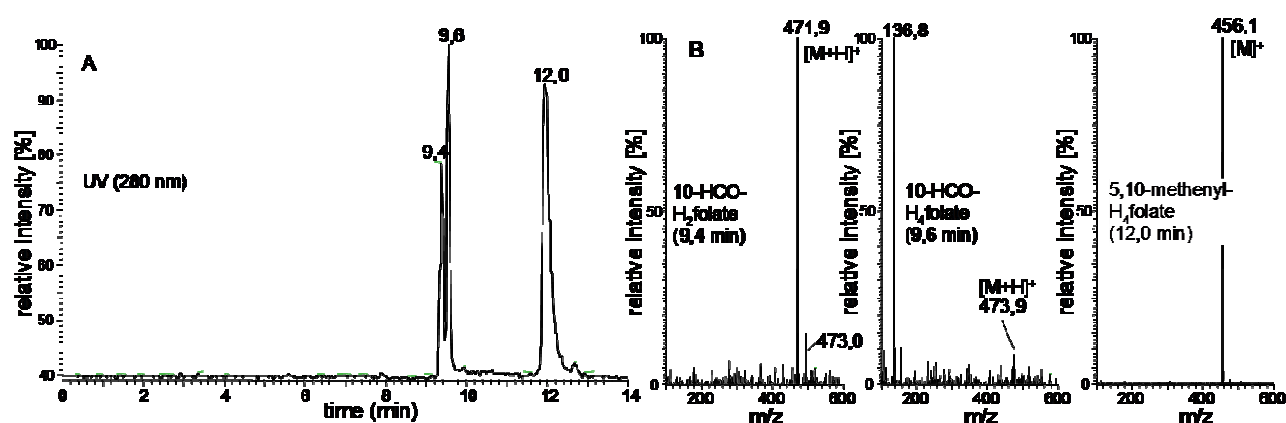

Supplement: Supplementary file 1 [file 4193275]
